# Supplementary material for: Dynamic geometry design of cyclic peptide architectures for RNA structure
Source: Royal Society of Chemistry journal article supplement (doi:10.1039/d3cp03384h), 2023-01-01
Supplement: d3cp03384h1.pdf [file d3cp03384h1.pdf]

1 **Dynamic geometry design of cyclic peptides architectures for RNA**

2 **structure**

3 Shangbo Ning<sup>1+</sup>, Min Sun<sup>2+</sup>, Xu Dong<sup>2</sup>, Anbang Li<sup>1</sup>, Chen Zeng<sup>3</sup>, Maili Liu<sup>2</sup>, Zhou Gong<sup>2\*</sup>, and Yunjie  
4 Zhao<sup>1\*</sup>

5 <sup>1</sup>Institute of Biophysics and Department of Physics, Central China Normal University, Wuhan, 430079,  
6 China

7 <sup>2</sup>State Key Laboratory of Magnetic Resonance and Atomic Molecular Physics, Innovation Academy for  
8 Precision Measurement Science and Technology Chinese Academy of Sciences, Wuhan, Hubei 430071,  
9 China

10 <sup>3</sup>Department of Physics, The George Washington University, Washington, DC 20052, USA

11

12 <sup>+</sup>Contributed equally to this work.

13 <sup>\*</sup>Correspondence:

14 Zhou Gong Email: gongzhou@wipm.ac.cn

15 Yunjie Zhao Email: yjzhaowh@mail.ccnu.edu.cn

16

17 **Table S1. The docking score of top 10 peptides and SL3**

| Peptide       | 1 | 2 | 3 | 4 | 5 | 6 | 7 | 8 | 9 | 10 | 11 | 12 | 13 | 14 | Score(kcal/mol) |
|---------------|---|---|---|---|---|---|---|---|---|----|----|----|----|----|-----------------|
| <b>L22</b>    | R | V | R | T | R | K | G | R | R | I  | R  | I  | p  | P  | -736.50         |
| <b>L22#15</b> | R | P | R | A | R | L | K | R | R | I  | R  | K  | p  | P  | -816.04         |
| <b>L22#09</b> | R | P | R | A | R | L | V | R | R | I  | R  | K  | p  | P  | -820.39         |
| <b>L22#01</b> | R | V | R | T | R | K | M | R | R | I  | R  | K  | p  | P  | -827.21         |
| <b>L22#13</b> | R | N | R | A | R | L | K | R | R | I  | R  | K  | p  | P  | -818.02         |
| <b>L22#29</b> | R | K | R | S | R | L | M | R | R | I  | R  | K  | p  | P  | -811.75         |
| <b>L22#06</b> | R | P | R | A | R | L | M | R | R | I  | R  | K  | p  | P  | -824.70         |
| <b>L22#16</b> | R | W | R | A | R | L | K | R | R | I  | R  | K  | p  | P  | -816.03         |
| <b>L22#11</b> | R | N | R | A | R | L | V | R | R | I  | R  | K  | p  | P  | -819.71         |
| <b>L22#22</b> | R | W | R | A | R | Q | M | R | R | I  | R  | K  | p  | P  | -813.32         |
| <b>L22#43</b> | R | P | R | S | R | L | M | R | R | I  | R  | K  | p  | P  | -809.71         |

18 \*D-Proline as lower-case p.

19 **Table S2. The binding free energy ( $\Delta G$ ) of top 10 peptides and SL3 in the 50-ns**20 **MD simulation**

| Peptide       | 1 | 2 | 3 | 4 | 5 | 6 | 7 | 8 | 9 | 10 | 11 | 12 | 13 | 14 | $\Delta G$ (kcal/mol) |
|---------------|---|---|---|---|---|---|---|---|---|----|----|----|----|----|-----------------------|
| <b>L22</b>    | R | V | R | T | R | K | G | R | R | I  | R  | I  | p  | P  | -50.08                |
| <b>L22#15</b> | R | P | R | A | R | L | K | R | R | I  | R  | K  | p  | P  | -121.84               |
| <b>L22#09</b> | R | P | R | A | R | L | V | R | R | I  | R  | K  | p  | P  | -114.48               |
| <b>L22#01</b> | R | V | R | T | R | K | M | R | R | I  | R  | K  | p  | P  | -102.94               |
| <b>L22#13</b> | R | N | R | A | R | L | K | R | R | I  | R  | K  | p  | P  | -101.45               |
| <b>L22#29</b> | R | K | R | S | R | L | M | R | R | I  | R  | K  | p  | P  | -98.54                |
| <b>L22#06</b> | R | P | R | A | R | L | M | R | R | I  | R  | K  | p  | P  | -95.18                |
| <b>L22#16</b> | R | W | R | A | R | L | K | R | R | I  | R  | K  | p  | P  | -93.16                |
| <b>L22#11</b> | R | N | R | A | R | L | V | R | R | I  | R  | K  | p  | P  | -91.59                |
| <b>L22#22</b> | R | W | R | A | R | Q | M | R | R | I  | R  | K  | p  | P  | -91.34                |
| <b>L22#43</b> | R | P | R | S | R | L | M | R | R | I  | R  | K  | p  | P  | -90.38                |

21 \*D-Proline as lower-case p.

22

23 **Table S3. The docking score of top 10 peptides and RBE**

| Peptide | 1 | 2 | 3 | 4 | 5 | 6 | 7 | 8 | 9 | 10 | 11 | 12 | 13 | 14 | Score (kcal/mol) |
|---------|---|---|---|---|---|---|---|---|---|----|----|----|----|----|------------------|
| L22     | R | V | R | T | R | K | G | R | R | I  | R  | I  | p  | P  | -741.69          |
| L22+16  | Q | G | R | R | R | K | G | T | R | T  | R  | I  | p  | P  | -879.99          |
| L22+05  | N | V | R | T | R | K | G | R | R | T  | R  | I  | p  | P  | -916.36          |
| L22+23  | V | H | R | K | R | K | G | T | R | K  | R  | I  | p  | P  | -874.70          |
| L22+49  | Q | G | R | R | R | K | G | C | R | T  | R  | I  | p  | P  | -863.32          |
| L22+40  | V | G | R | R | R | K | G | T | R | K  | R  | I  | p  | P  | -865.45          |
| L22+34  | V | W | R | Q | R | K | G | T | R | K  | R  | I  | p  | P  | -867.98          |
| L22+25  | Q | G | R | R | R | K | G | A | R | T  | R  | I  | p  | P  | -871.46          |
| L22+41  | Q | G | R | W | R | K | G | T | R | T  | R  | I  | p  | P  | -865.29          |
| L22+09  | V | V | R | T | R | K | G | R | R | F  | R  | I  | p  | P  | -887.50          |
| L22+42  | V | H | R | R | R | K | G | P | R | K  | R  | I  | p  | P  | -865.20          |

24 **Table S4. The binding free energy ( $\Delta G$ ) of top 10 peptides and RBE in 50-ns MD**25 **simulation**

| Peptide | 1 | 2 | 3 | 4 | 5 | 6 | 7 | 8 | 9 | 10 | 11 | 12 | 13 | 14 | $\Delta G$ (kcal/mol) |
|---------|---|---|---|---|---|---|---|---|---|----|----|----|----|----|-----------------------|
| L22     | R | V | R | T | R | K | G | R | R | I  | R  | I  | p  | P  | -75.02                |
| L22+16  | Q | G | R | R | R | K | G | T | R | T  | R  | I  | p  | P  | -105.38               |
| L22+05  | N | V | R | T | R | K | G | R | R | T  | R  | I  | p  | P  | -92.48                |
| L22+23  | V | H | R | K | R | K | G | T | R | K  | R  | I  | p  | P  | -92.94                |
| L22+49  | Q | G | R | R | R | K | G | C | R | T  | R  | I  | p  | P  | -93.30                |
| L22+40  | V | G | R | R | R | K | G | T | R | K  | R  | I  | p  | P  | -92.31                |
| L22+34  | V | W | R | Q | R | K | G | T | R | K  | R  | I  | p  | P  | -91.83                |
| L22+25  | Q | G | R | R | R | K | G | A | R | T  | R  | I  | p  | P  | -89.48                |
| L22+41  | Q | G | R | W | R | K | G | T | R | T  | R  | I  | p  | P  | -85.44                |
| L22+09  | V | V | R | T | R | K | G | R | R | F  | R  | I  | p  | P  | -81.70                |
| L22+42  | V | H | R | R | R | K | G | P | R | K  | R  | I  | p  | P  | -83.43                |

26 \*D-Proline as lower-case p.

27 **Table S5. The docking score (*kcal/mol*) of three cyclic peptides and four RNAs.**

| Cyclic peptide | TAR     | SL3     | RBE     | PBS     |
|----------------|---------|---------|---------|---------|
| L22            | -612.53 | -736.50 | -741.69 | -740.28 |
| L22#15         | -696.03 | -713.44 | -656.72 | -709.66 |
| L22+16         | -601.71 | -572.16 | -710.19 | -731.30 |

28

29 **Table S6. The binding free energy (*kcal/mol*) of five 200-ns trajectories for SL3-**  
30 **L22#15.**

| Trajectory                  | MD01   | MD02   | MD02   | MD04   | MD05   | AVE    | STD  |
|-----------------------------|--------|--------|--------|--------|--------|--------|------|
| $\Delta G$                  | -97.29 | -86.35 | -86.48 | -87.26 | -82.16 | -87.91 | 5.02 |
| TAS                         | -51.27 | -53.37 | -50.64 | -48.92 | -51.02 | -51.04 | 1.42 |
| $\Delta G_{\text{binding}}$ | -46.02 | -32.98 | -35.84 | -38.34 | -31.14 | -36.86 | 5.19 |

31

32 **Table S7. The binding free energy (*kcal/mol*) of five 200-ns trajectories for RBE-**  
33 **L22+16.**

| Trajectory                  | MD01   | MD02   | MD02   | MD04   | MD05   | AVE    | STD  |
|-----------------------------|--------|--------|--------|--------|--------|--------|------|
| $\Delta G$                  | -83.18 | -99.79 | -91.12 | -98.69 | -84.22 | -91.40 | 6.97 |
| TAS                         | -67.48 | -66.90 | -67.78 | -71.16 | -68.39 | -68.34 | 1.49 |
| $\Delta G_{\text{binding}}$ | -15.70 | -32.89 | -23.34 | -27.53 | -15.83 | -23.06 | 6.68 |

34

35 **Table S8. The binding free energy (*kcal/mol*) of 200-ns trajectories for control.**

| Complex                     | SL3-NC | SL3-L22 | RBE-RSG1.5 | RBE-L22 |
|-----------------------------|--------|---------|------------|---------|
| $\Delta G$                  | -63.20 | -77.08  | -78.26     | -87.06  |
| TAS                         | -53.93 | -51.81  | -62.08     | -71.29  |
| $\Delta G_{\text{binding}}$ | -9.27  | -25.27  | -16.18     | -15.77  |

36

37

39 **Table S9. The stereoisomers of lysine and arginine.**

| Name       | Type   | Formula                                                      | Molecular Weight | Formal Charge | 2D structure                                                                          | Resource References |
|------------|--------|--------------------------------------------------------------|------------------|---------------|---------------------------------------------------------------------------------------|---------------------|
| <b>LYS</b> | L-type | C <sub>6</sub> H <sub>15</sub> N <sub>2</sub> O <sub>2</sub> | 147.19           | 1             |    | DB00123             |
| <b>DLY</b> | D-type | C <sub>6</sub> H <sub>14</sub> N <sub>2</sub> O <sub>2</sub> | 146.19           | 0             |    | DB03252             |
| <b>DAB</b> | L-type | C <sub>4</sub> H <sub>10</sub> N <sub>2</sub> O <sub>2</sub> | 118.13           | 0             |    | DB03817             |
| <b>4FO</b> | D-type | C <sub>4</sub> H <sub>10</sub> N <sub>2</sub> O <sub>2</sub> | 118.13           | 0             |    | 134490              |
| <b>ORN</b> | L-type | C <sub>5</sub> H <sub>12</sub> N <sub>2</sub> O <sub>2</sub> | 132.16           | 0             |    | DB00129             |
| <b>ORD</b> | D-type | C <sub>5</sub> H <sub>12</sub> N <sub>2</sub> O <sub>2</sub> | 132.16           | 0             |   | 71082               |
| <b>ARG</b> | L-type | C <sub>6</sub> H <sub>15</sub> N <sub>4</sub> O <sub>2</sub> | 175.21           | 1             |  | DB00125             |
| <b>DAR</b> | D-type | C <sub>6</sub> H <sub>15</sub> N <sub>4</sub> O <sub>2</sub> | 175.21           | 1             |  | DB04027             |
| <b>4J5</b> | L-type | C <sub>5</sub> H <sub>13</sub> N <sub>4</sub> O <sub>2</sub> | 161.18           | 1             |  | 137348247           |
| <b>HRG</b> | L-type | C <sub>7</sub> H <sub>16</sub> N <sub>4</sub> O <sub>2</sub> | 188.23           | 0             |  | DB03974             |

40 \*The stereoisomers of lysine and arginine, which adopt extended, shortened, non-  
41 standard or chiral mimics, can be used to construct new peptide libraries to improve  
42 contacts with RNA. The amino acids' side chain length and chirality can be directed to  
43 make the cyclic peptide more suitable for a specific RNA pocket.

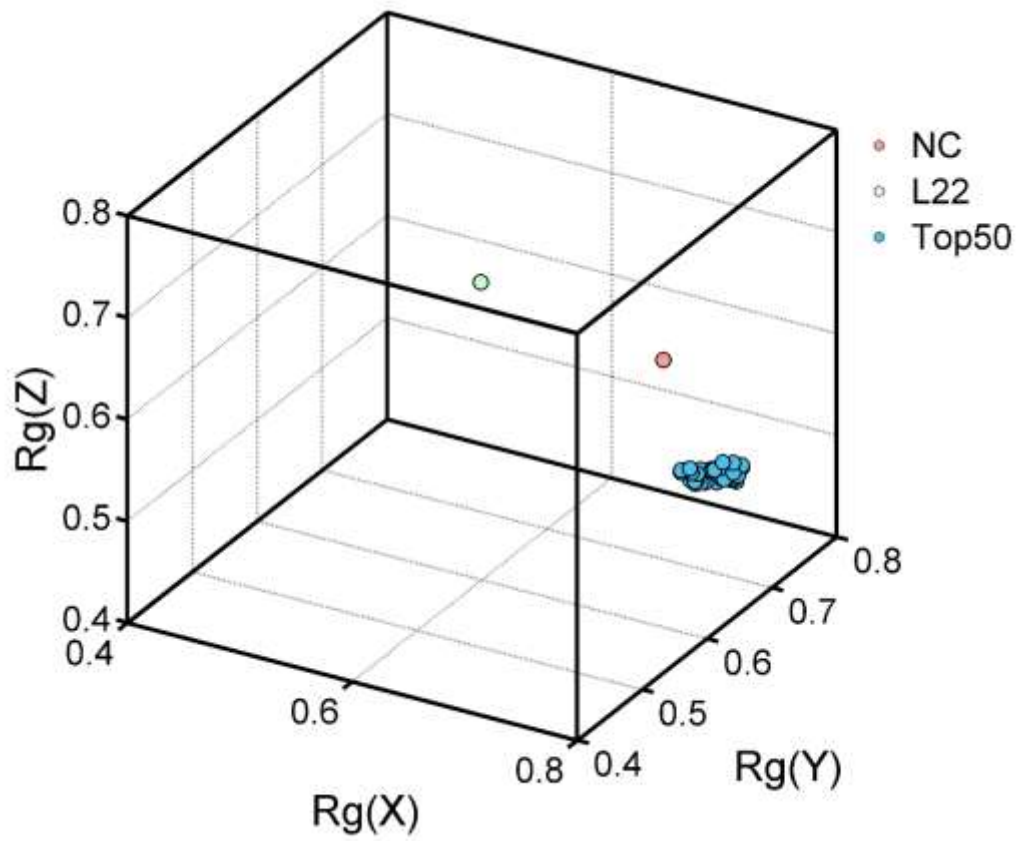

44

45 **Figure S1.** The radius of gyration (Rg) around the X, Y and Z axes of NC, L22 and top

46 50 cyclic peptides.

47

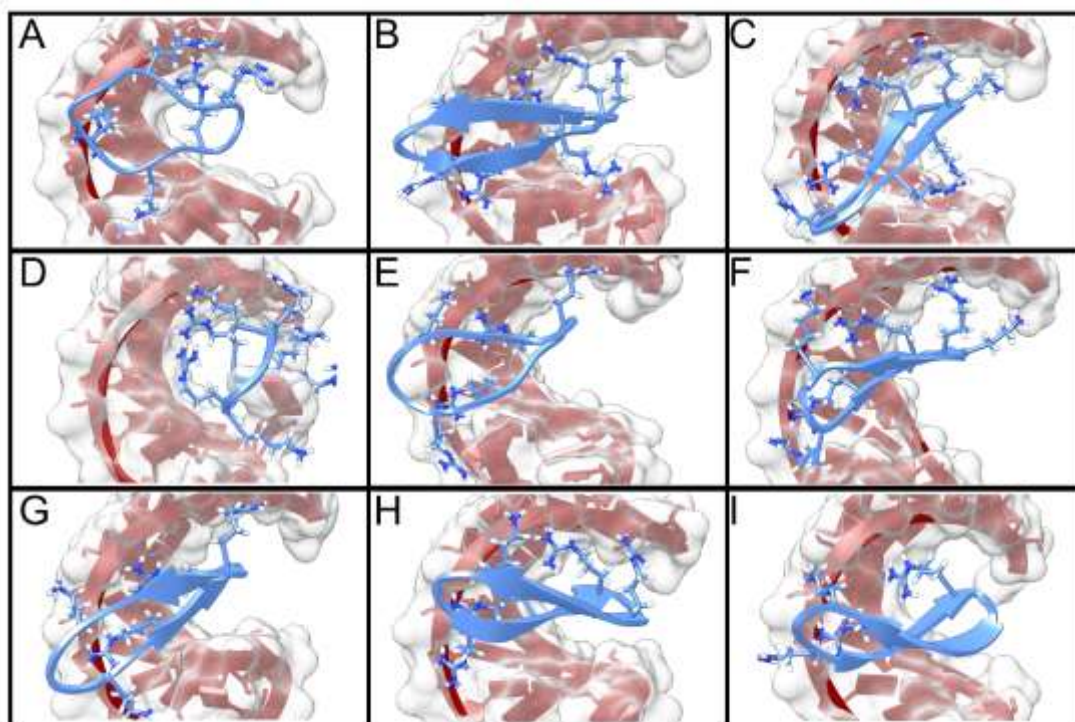

49

50 **Figure S2.** The interactions between SL3 and the other 9 cyclic peptides. (A). L22#09,

51 (B) L22#01, (C) L22#13, (D) L22#29, (E) L22#06, (F) L22#16, (G) L22#11, (H)

52 L22#22, (I) L22#43.

53

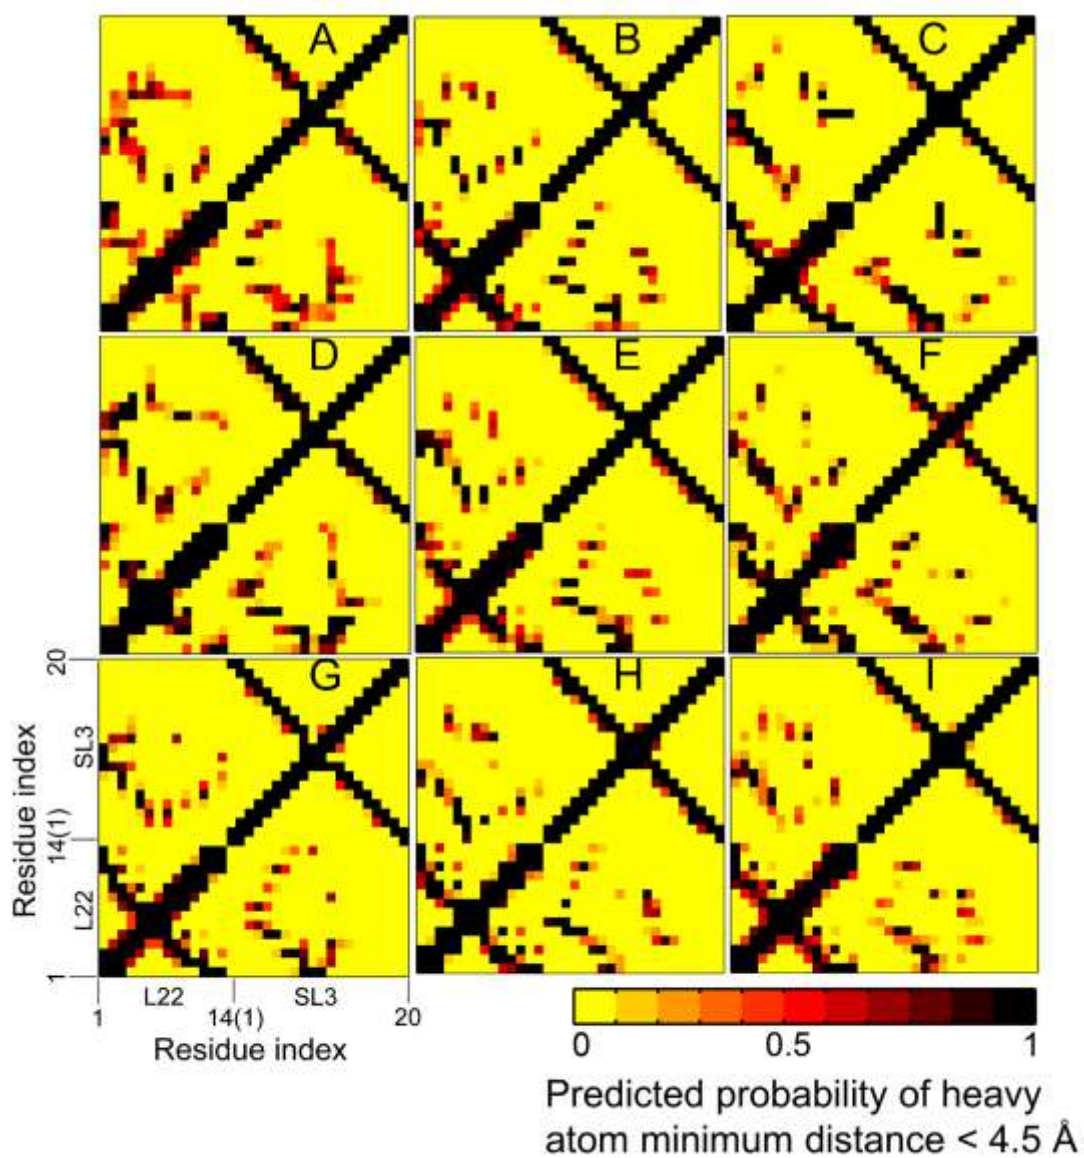

54

55 **Figure S3.** The contact map between SL3 and the other 9 cyclic peptides in the 50-ns

56 MD simulation. (A). L22#09, (B) L22#01, (C) L22#13, (D) L22#29, (E) L22#06, (F)

57 L22#16, (G) L22#11, (H) L22#22, (I) L22#43.

58



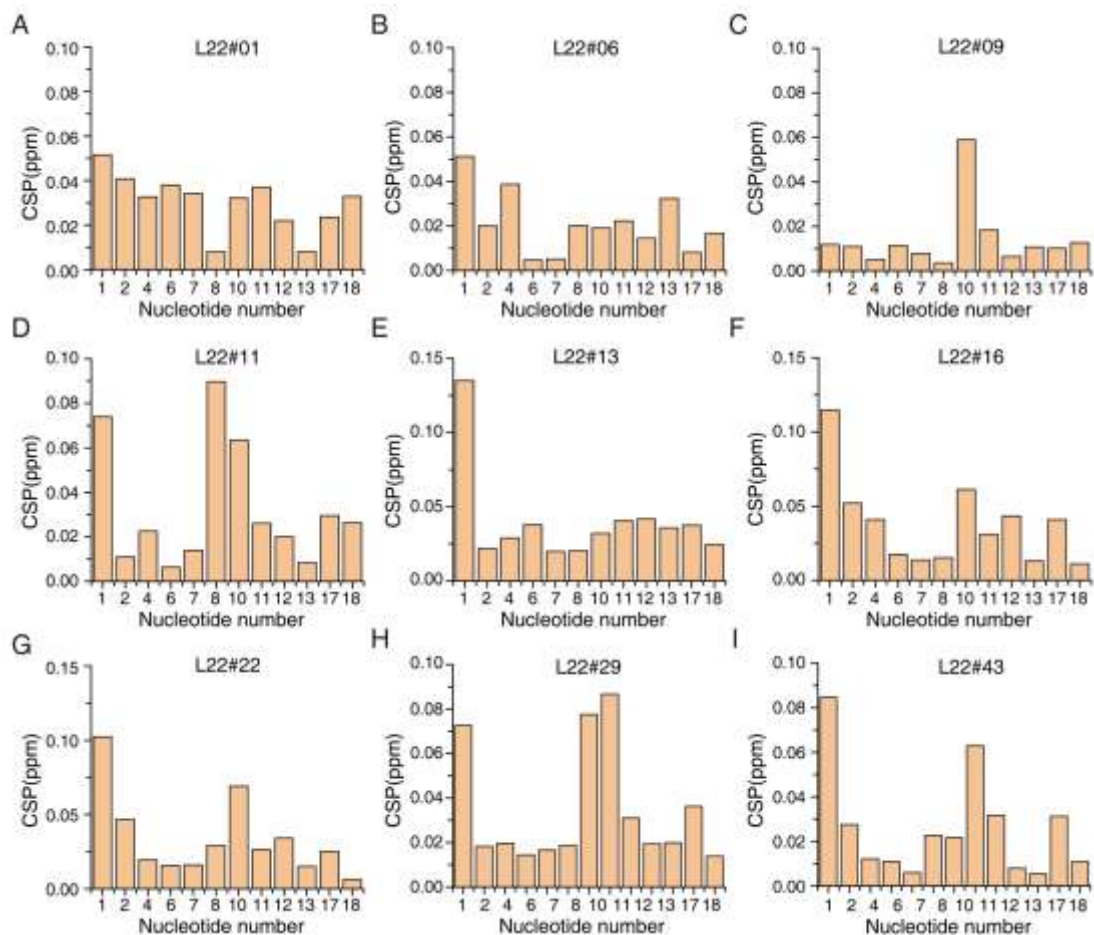

59

60 **Figure S4.** CSPs from titration of the other 9 peptides (400 $\mu$ M) into the SL3 RNA  
 61 solution (200 $\mu$ M) under experimental conditions of NaH<sub>2</sub>PO<sub>4</sub>(25 mM), NaCl (100 mM),  
 62 10% D<sub>2</sub>O and pH 6.8 at 280K. The analysis specifically examines the nucleotide signals  
 63 corresponding to C8-H8 or C6-H6. The significant CSPs observed in the nucleotides  
 64 indicate their potential involvement in establishing the interaction interface with SL3.

65

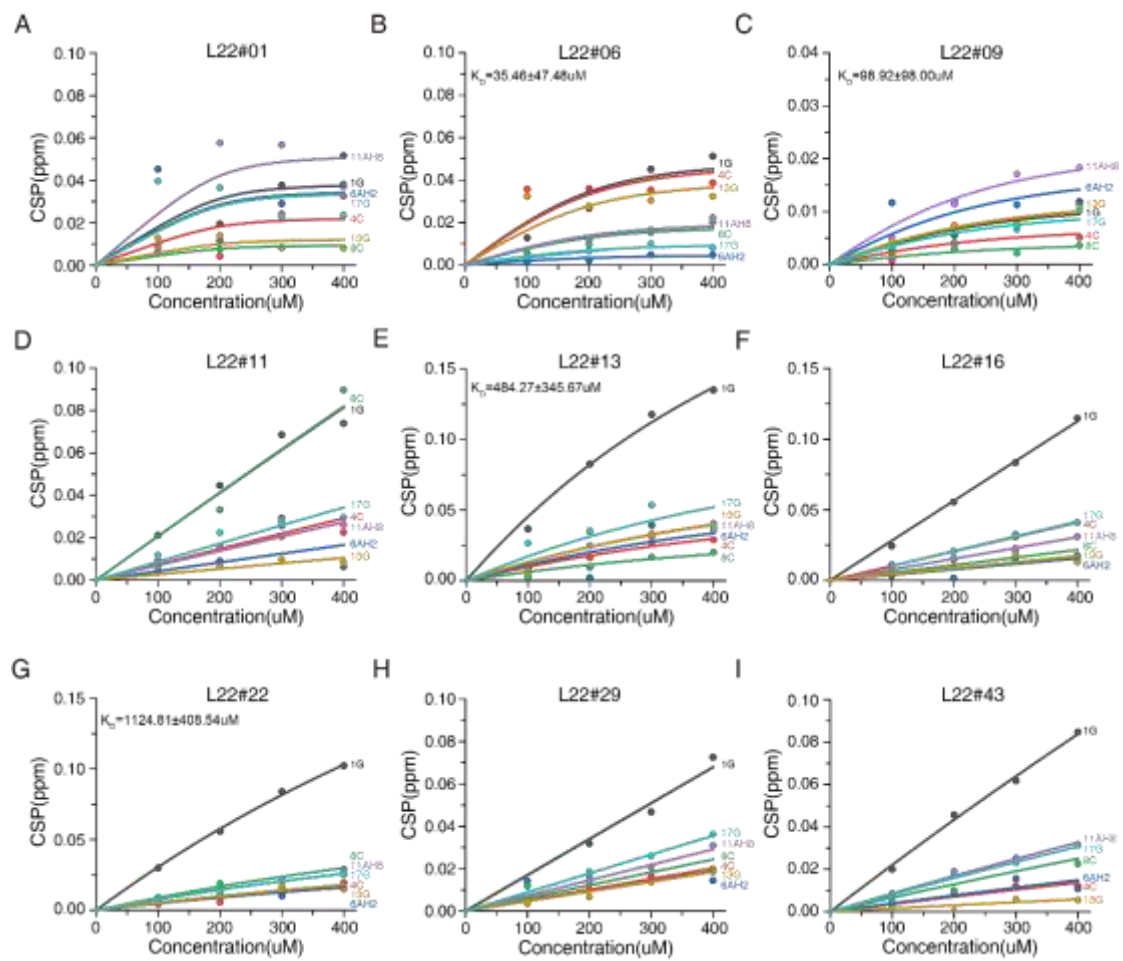

66

67 **Figure S5.** Global fitting of the binding equilibrium constant of the other 9 peptides to

68 SL3 using nucleotides exhibiting significant CSPs (represented by different colors).

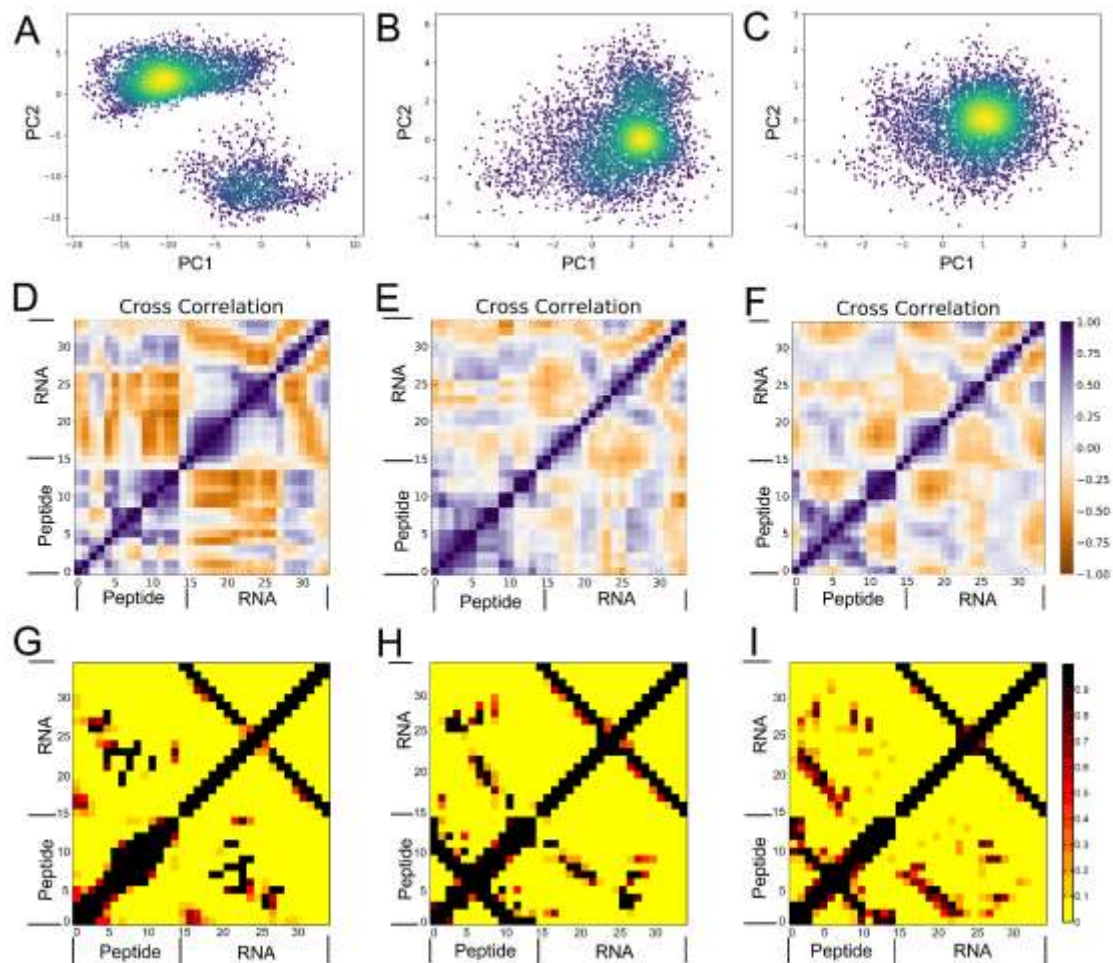

69

70 **Figure S6.** Different binding modes of three peptides to SL3 RNA. The principal  
 71 component analysis (PCA) between SL3 and three peptides in the 200-ns MD  
 72 simulation, (A) SL3-NC, (B) SL3-L22, (C) SL3-L22#15. The dynamic cross-  
 73 correlation matrix (DCC) between SL3 and three peptides in the 200-ns MD simulation,  
 74 (D) SL3-NC, (E) SL3-L22, (F) SL3-L22#15. The contact map between SL3 and three  
 75 peptides in the 200-ns MD simulation, (G) SL3-NC, (H) SL3-L22, (I) SL3-L22#15.

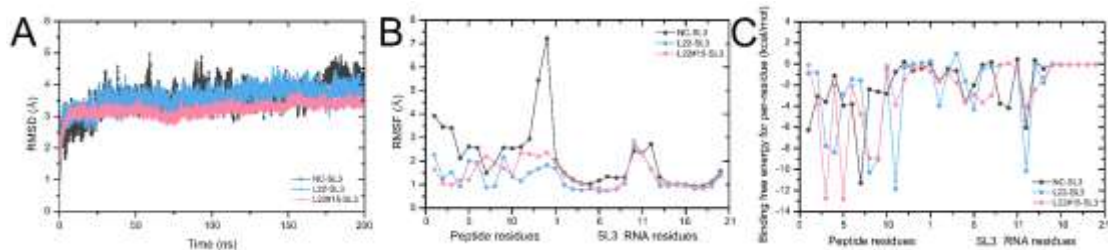

76

77 **Figure S7.** Dynamics fluctuation of three systems in the 200-ns MD simulation, NC-  
 78 SL3, L22-SL3, and L22#15-SL3. (A) The root-mean-square deviation of the overall  
 79 structure of the three complexes. (B) The root-mean-square fluctuation of per-residue  
 80 of the three complexes. (C) The free energy contributes to the binding free energy of  
 81 the per-residue of the three complexes.

82

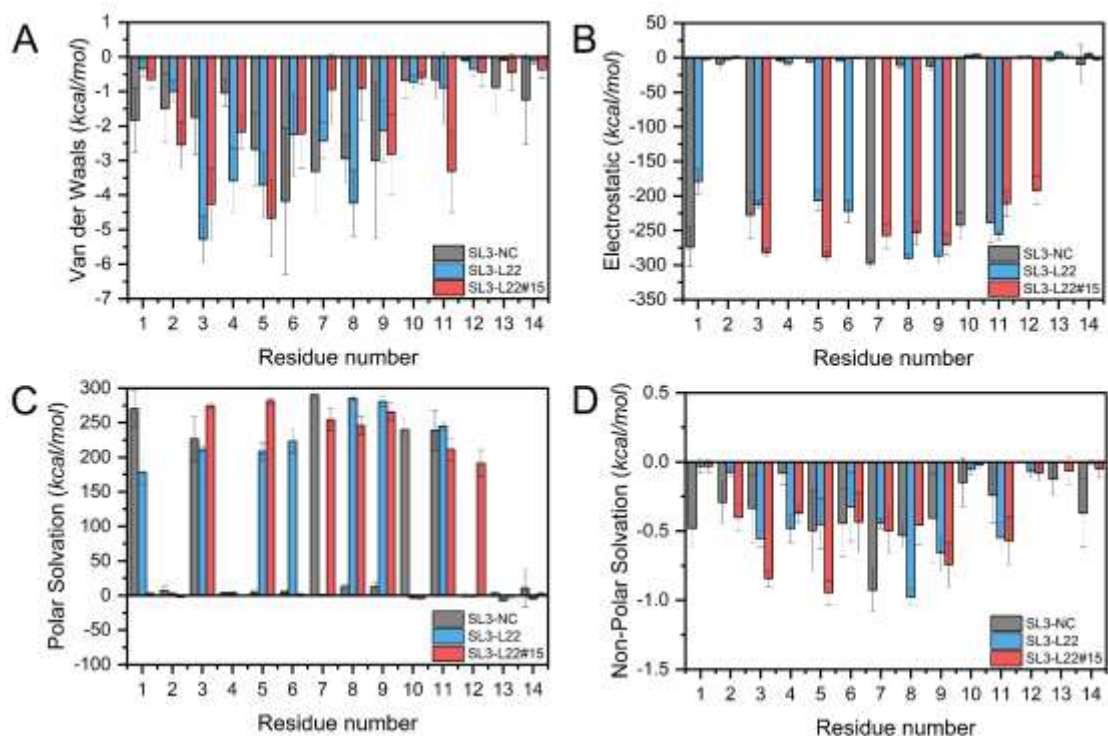

83

84 **Figure S8.** The free energy contribution of SL3 RNA binding to the three peptides from  
 85 different interactions. (A) van der Waals, (B) electrostatic, (C) Polar Solvation, (D)  
 86 Non-polar Solvation.

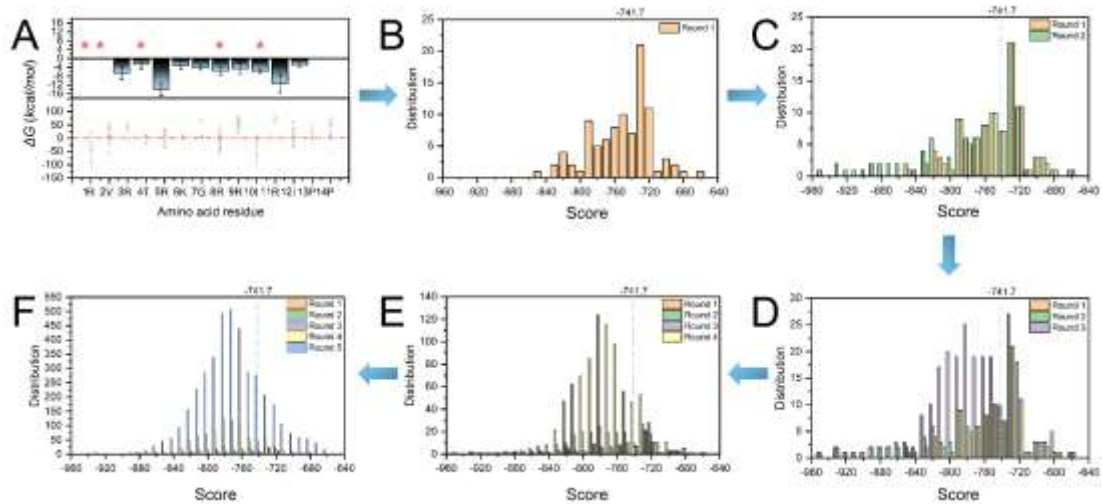

87

88 **Figure S9.** The top 50 inhibitors for RBE are preliminarily screened by docking and  
 89 per-residue-free energy decomposition. (A) Decomposing the free energy contributions  
 90 in a per-residue of L22-RBE are calculated by MM-GBSA. Single point mutations are  
 91 performed for per-residue of L22. The docking scores are calculated by HDOCK. The  
 92 interaction optimization for the cyclic peptides and RBE RNA is divided into five steps:  
 93 (B) round 1, (C) round 2, (D) round 3, (E) round 4, (F) round 5.

94

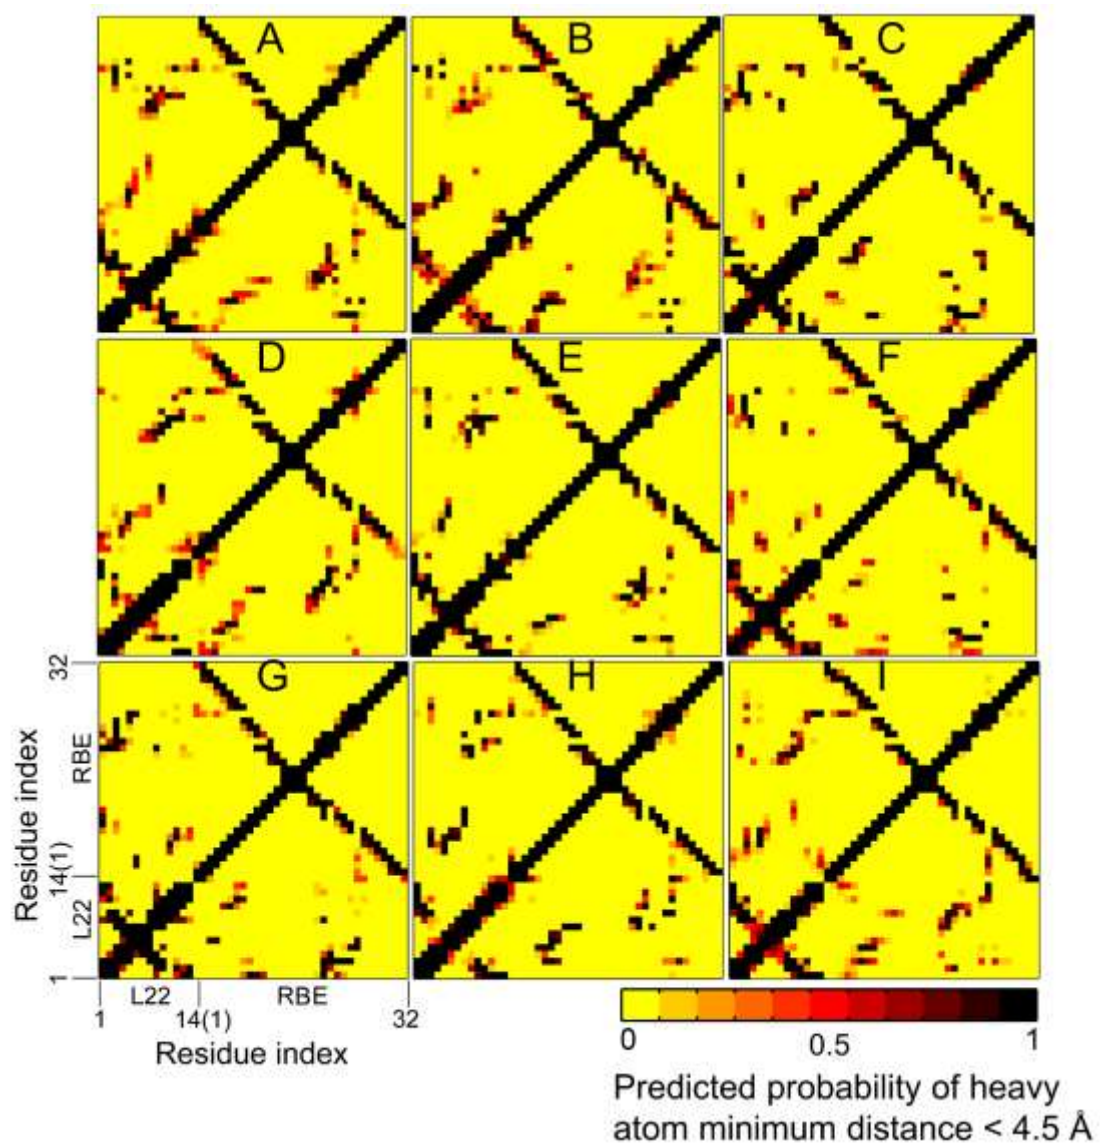

95

96 **Figure S10.** The contact map between RBE and the other 9 cyclic peptides in 50-ns  
 97 MD simulation. (A). L22+05, (B) L22+23, (C) L22+49, (D) L22+40, (E) L22+34, (F)  
 98 L22+25, (G) L22+41, (H) L22+09, (I) L22+42.

99

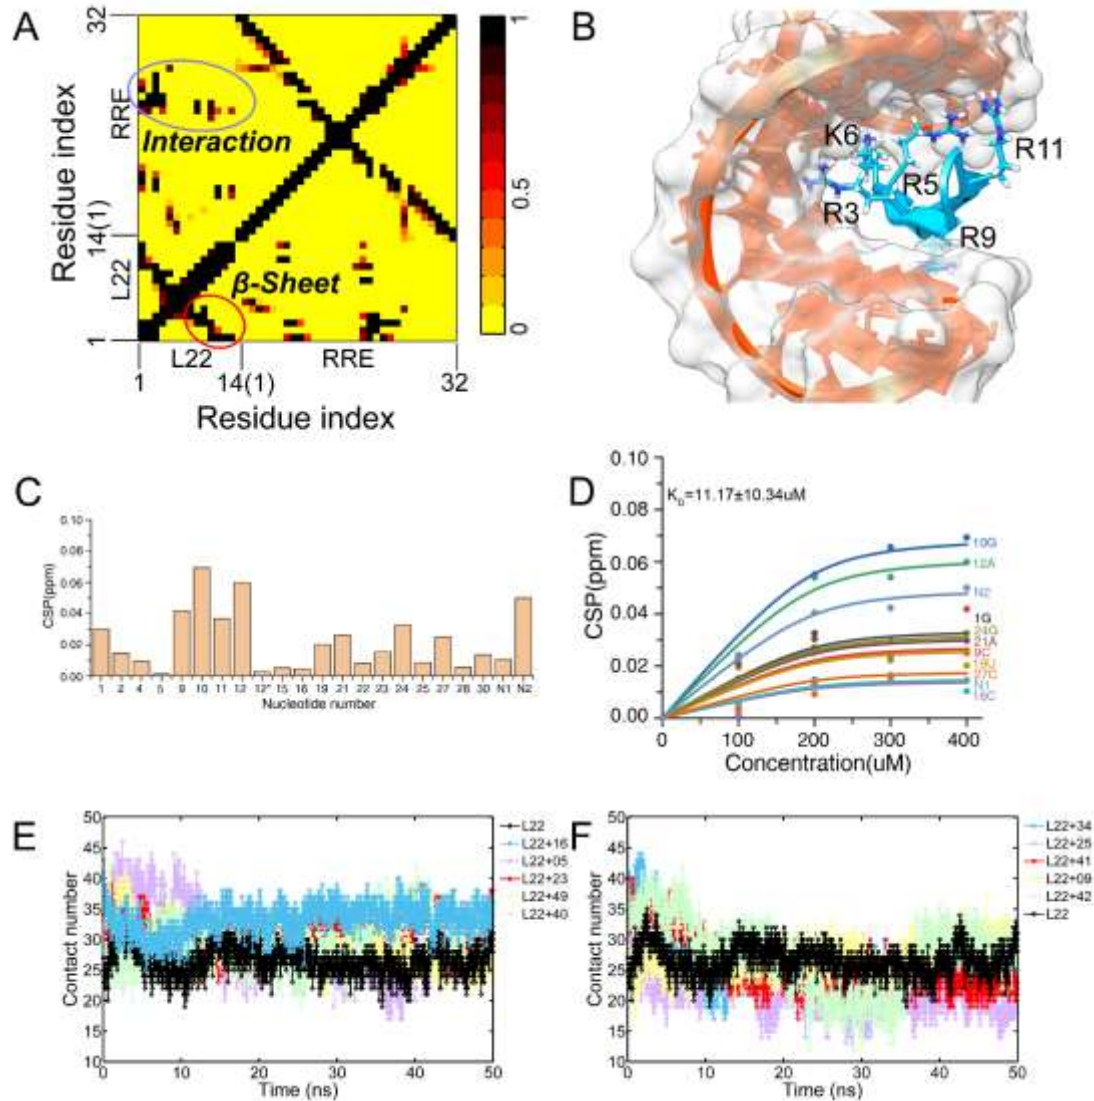

100

101 **Figure S11.** The binding affinity between top 1 peptide L22+16 and RBE in 50-ns MD  
 102 simulation and NMR experiments. (A) The contact map shows that the interaction  
 103 between L22+16 and RBE is stable and the secondary structure of cyclic peptide is still  
 104 stabilized in the MD simulation. (B) The interaction surface locates at the hairpin stem-  
 105 loop of RBE and the positively charged amino acids of L22+16. (C) CSPs from titration  
 106 of the L22+16 (400 $\mu$ M) into the RBE RNA solution (200 $\mu$ M) under experimental  
 107 conditions of NaH<sub>2</sub>PO<sub>4</sub> (25 mM), NaCl (100 mM), 10% D<sub>2</sub>O and pH 6.8 at 298K. The  
 108 analysis specifically examines the nucleotide signals corresponding to C8-H8 or C6-  
 109 H6. Additionally, \* represents the signal of nucleotide C2-H2. N1 and N2 mean the  
 110 corresponding peaks that were not assigned. The significant CSPs observed in the  
 111 nucleotides indicate their potential involvement in establishing the interaction interface  
 112 with RBE RNA. (D) Global fitting of the binding equilibrium constant of L22+16 and

113 RBE RNA using nucleotides exhibiting significant CSPs (represented by different  
 114 colors). (E). The contact number of residue-residue pairs between top 1-5 and RBE  
 115 changed along with time; (F) The contact number of residue-residue pairs between top  
 116 1-5 and RBE changed along with time.

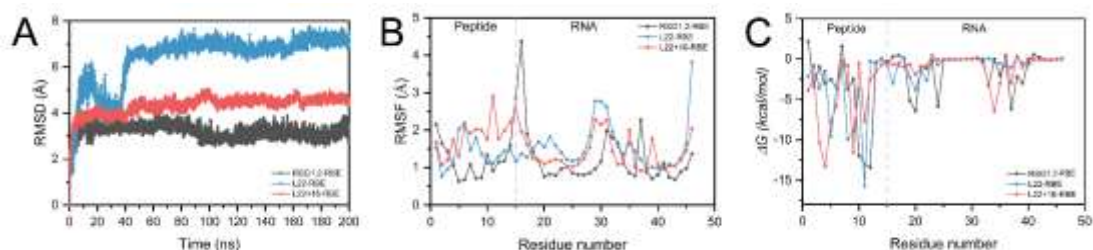

117  
 118 **Figure S12.** Dynamics fluctuation of three systems in the 200-ns MD simulation, RSG-  
 119 1.2-RBE, L22-RBE, and L22+16-RBE. (A) The root-mean-square deviation of the  
 120 overall structure of the three complexes. (B) The root-mean-square fluctuation of per-  
 121 residue of the three complexes. (C) The free energy contributes to the binding free  
 122 energy of the per-residue of the three complexes.

123

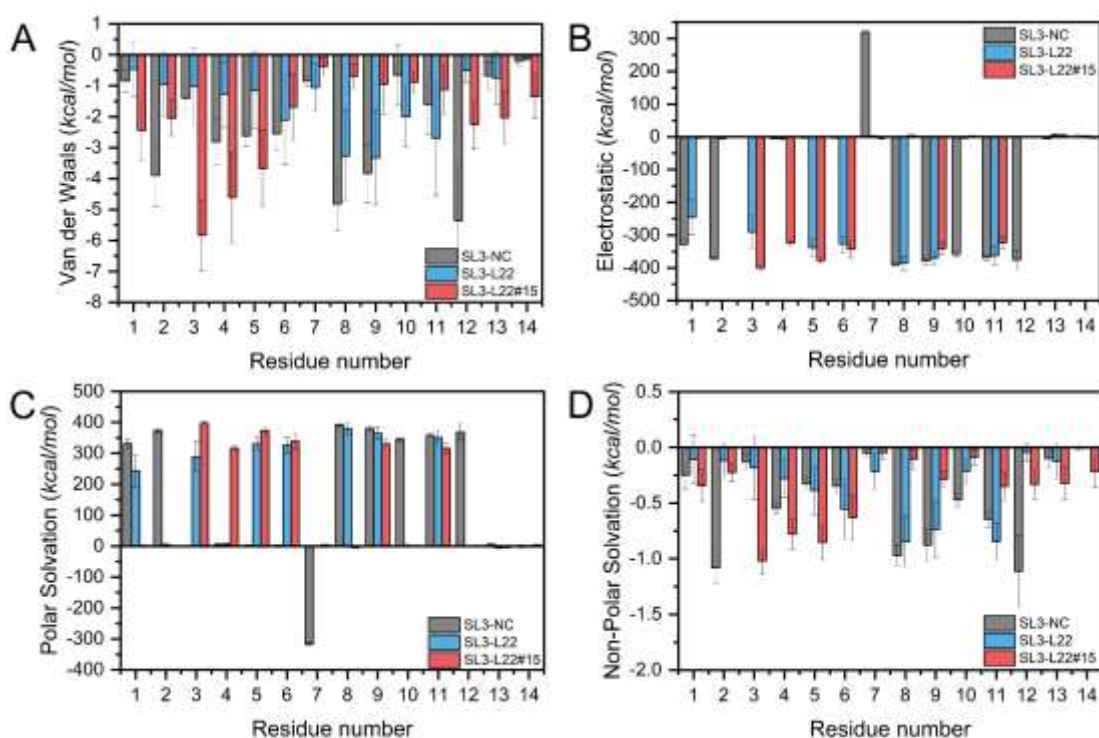

124  
 125 **Figure S13.** The free energy contribution of RBE RNA binding to the three peptides  
 126 from different interactions. (A) van der Waals, (B) electrostatic, (C) Polar Solvation,  
 127 (D) Non-polar Solvation.



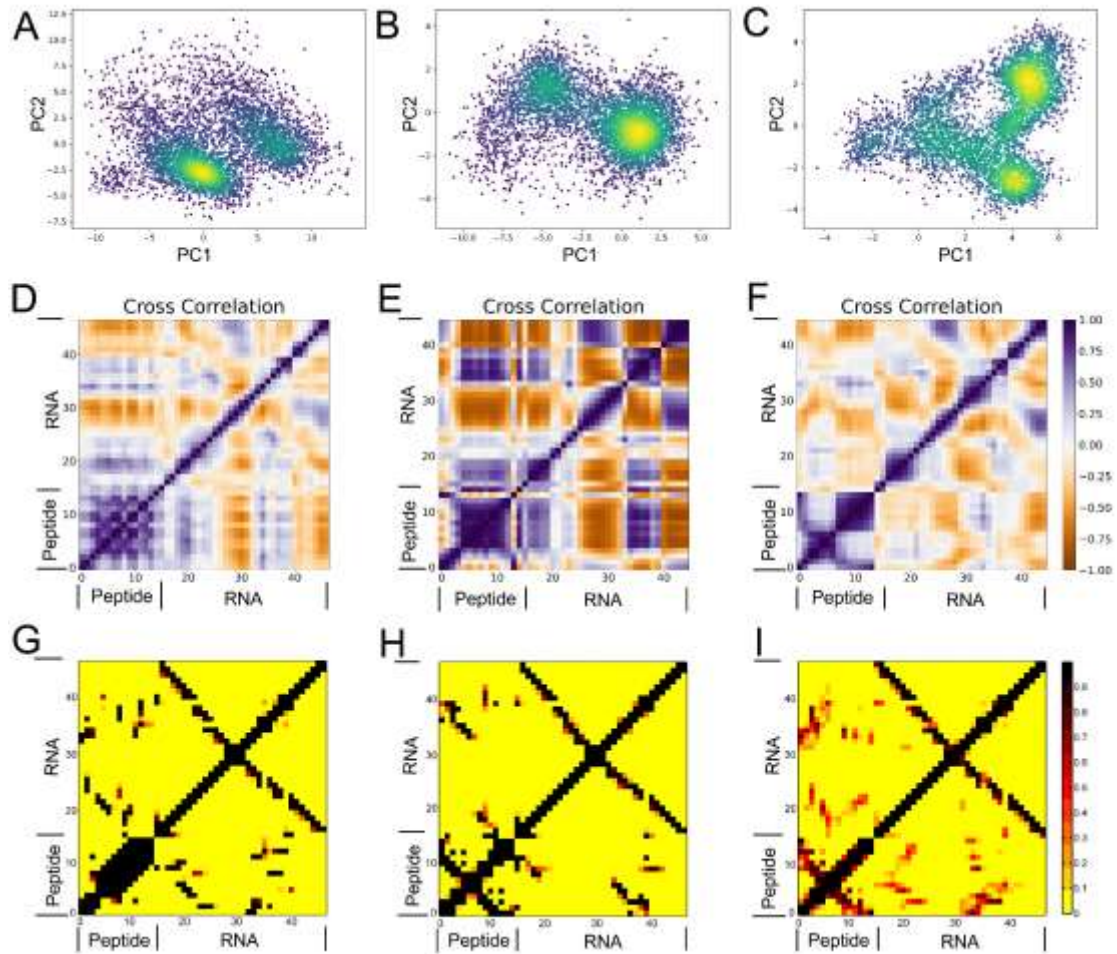

128

129 **Figure S14.** Different binding modes of three peptides to RBE RNA. The principal  
 130 component analysis (PCA) between RBE and three peptides in the 200-ns MD  
 131 simulation, (A) RBE-RSG-1.5, (B) RBE-L22, (C) RBE-L22+16. The dynamic cross-  
 132 correlation matrix (DCC) between RBE and three peptides in the 200-ns MD simulation,  
 133 (D) RBE-RSG-1.5, (E) RBE-L22, (F) RBE-L22+16. The contact map between RBE  
 134 and three peptides in the 200-ns MD simulation, (G) RBE-RSG-1.5, (H) RBE-L22, (I)  
 135 RBE-L22+16.

136

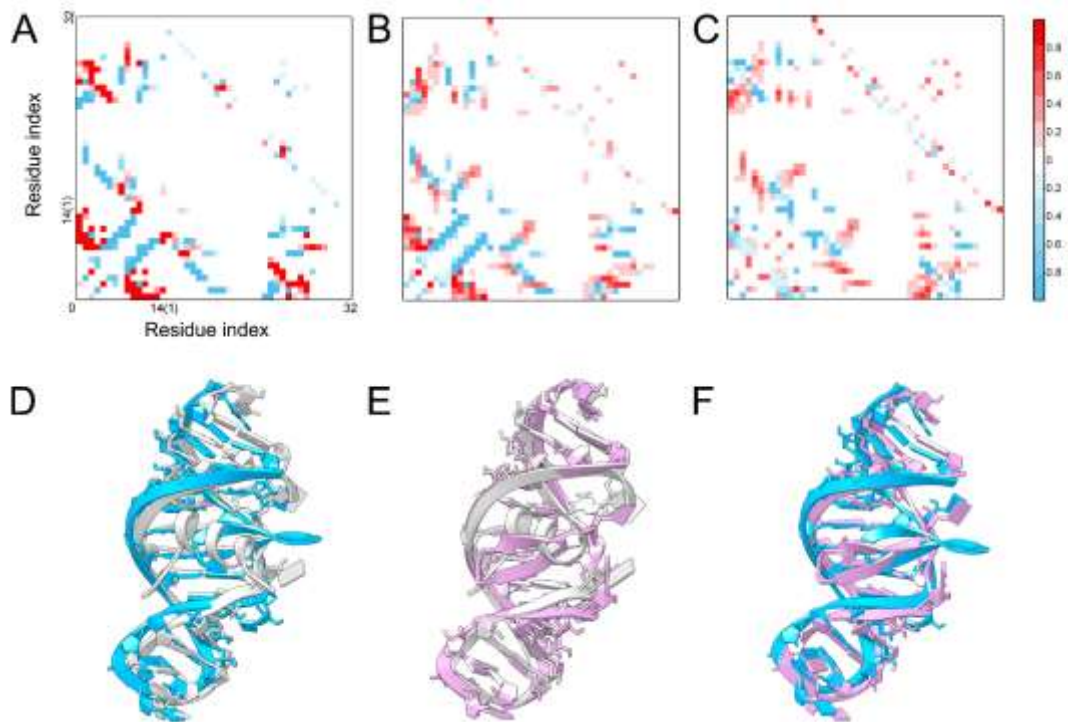

137

138 **Figure S15.** The comparison of binding modes between three peptides and RBE in 200-  
 139 ns MD simulation. The different of contact between RBE and three peptides, (A)  
 140 L22/RSG-1.2, (B) L22+16/RSG-1.2 and (C) L22+16/L22. The structural overlap  
 141 corresponding to the contact map, (D) L22/RSG-1.2, (E) L22+16/RSG-1.2 and (F)  
 142 L22+16/L22.

143

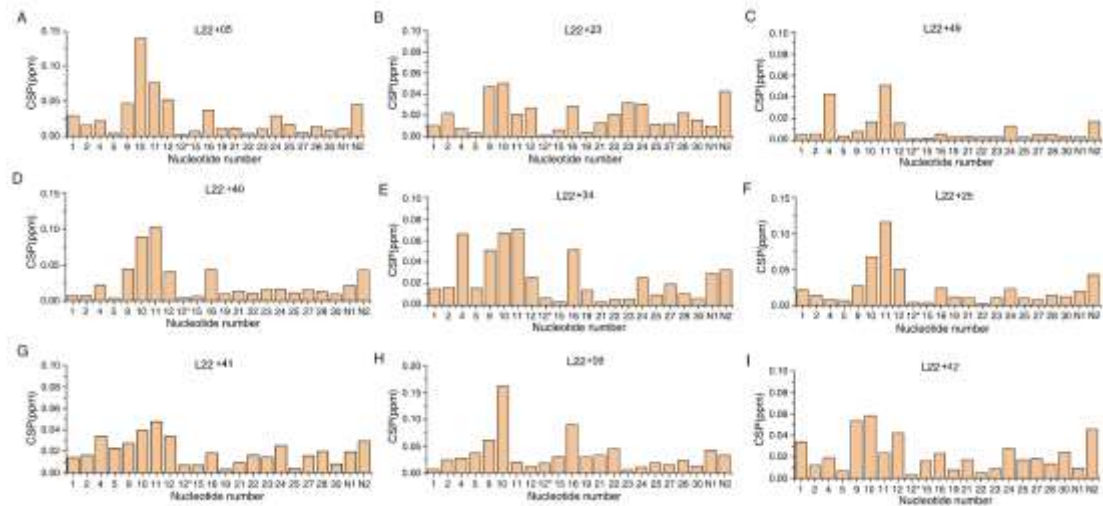

144

145 **Figure S16.** CSPs from titration of the other 9 peptides (400 $\mu$ M) into the RBE RNA  
 146 solution (200 $\mu$ M) under experimental conditions of NaH<sub>2</sub>PO<sub>4</sub>(25 mM), NaCl (100 mM),  
 147 10% D<sub>2</sub>O and pH 6.8 at 298K. The analysis specifically examines the nucleotide signals  
 148 corresponding to C8-H8 or C6-H6. Additionally, \* represents the signal of nucleotide  
 149 C2-H2. N1 and N2 mean the corresponding peaks that were not assigned. The  
 150 significant CSPs observed in the nucleotides indicate their potential involvement in  
 151 establishing the interaction interface with RBE RNA.

152

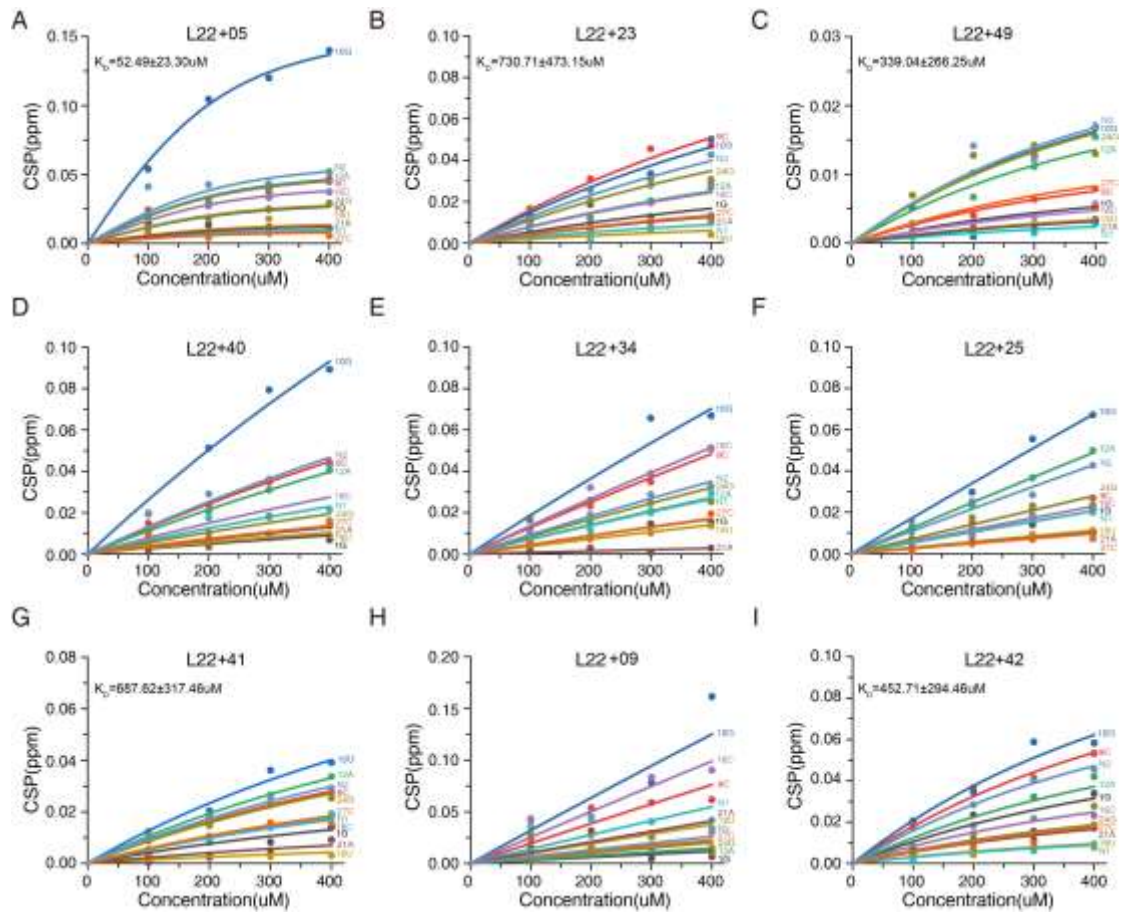

153

154 **Figure S17.** Global fitting of the binding equilibrium constant of the other 9 peptides  
 155 to RBE RNA using nucleotides exhibiting significant CSPs (represented by different  
 156 colors).
